# Supplementary material for: Enhanced visible light induced photocatalytic activity on the degradation of organic pollutants by SnO nanoparticle decorated hierarchical ZnO nanostructures
Source: Royal Society of Chemistry journal article supplement (doi:10.1039/c6ra19824d), 2016-01-01
Supplement: c6ra19824d1.pdf [file c6ra19824d1.pdf]

## Supplementary Information

### Enhanced visible light induced photocatalytic activity on the degradation of organic pollutant by SnO nanoparticles decorated hierarchical ZnO nanostructures

S. Harish<sup>a</sup>, J. Archana<sup>a,b</sup>, M. Navaneethan<sup>a\*</sup>, A. Silambarasan<sup>b</sup>, K.D. Nisha<sup>b</sup>, S. Ponnusamy<sup>b\*\*</sup>,  
C. Muthamizhchelvan<sup>b</sup>, H. Ikeda<sup>a</sup>, D.K. Aswal<sup>c</sup>, Y. Hayakawa<sup>a\*\*\*</sup>

<sup>a</sup>Research Institute of Electronics, Shizuoka University, 3-5-1 Johoku, Naka-ku, Hamamatsu, Shizuoka 432-8011, Japan

<sup>b</sup>Department of Physics and Nanotechnology, SRM University, Kattankulathur, Chennai, 603203, Tamil Nadu, India.

<sup>c</sup>National Physical Laboratory, Dr. K.S. Krishnan Marg, New Delhi – 110012, India.

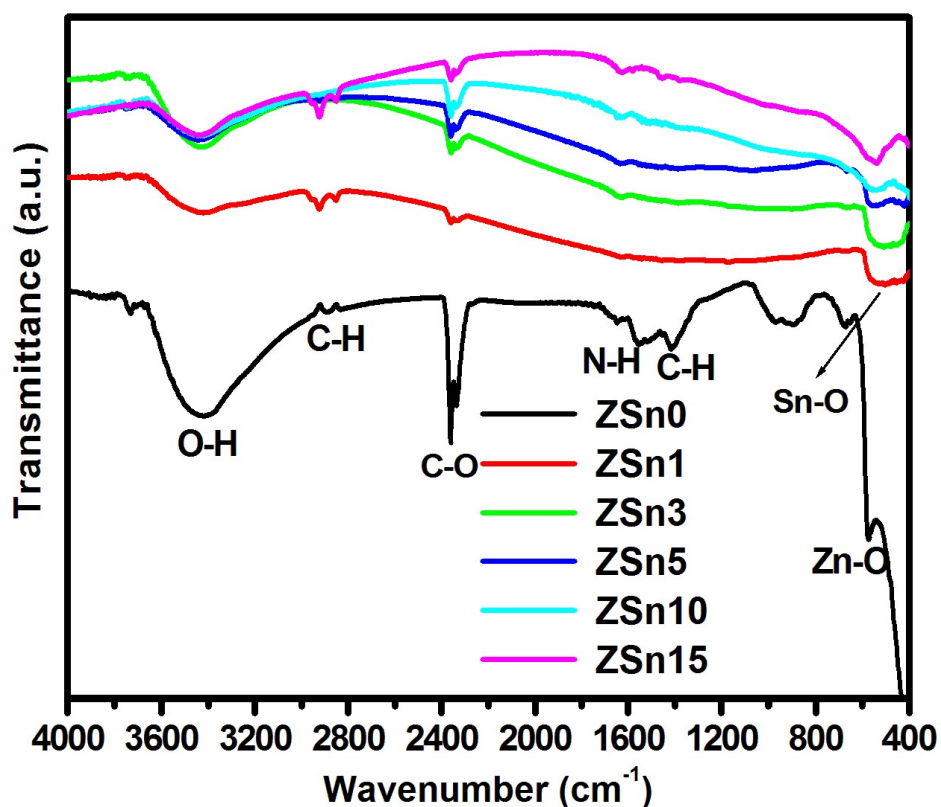

Fig. S1. FTIR spectra of ZnO/SnO nanocomposites.

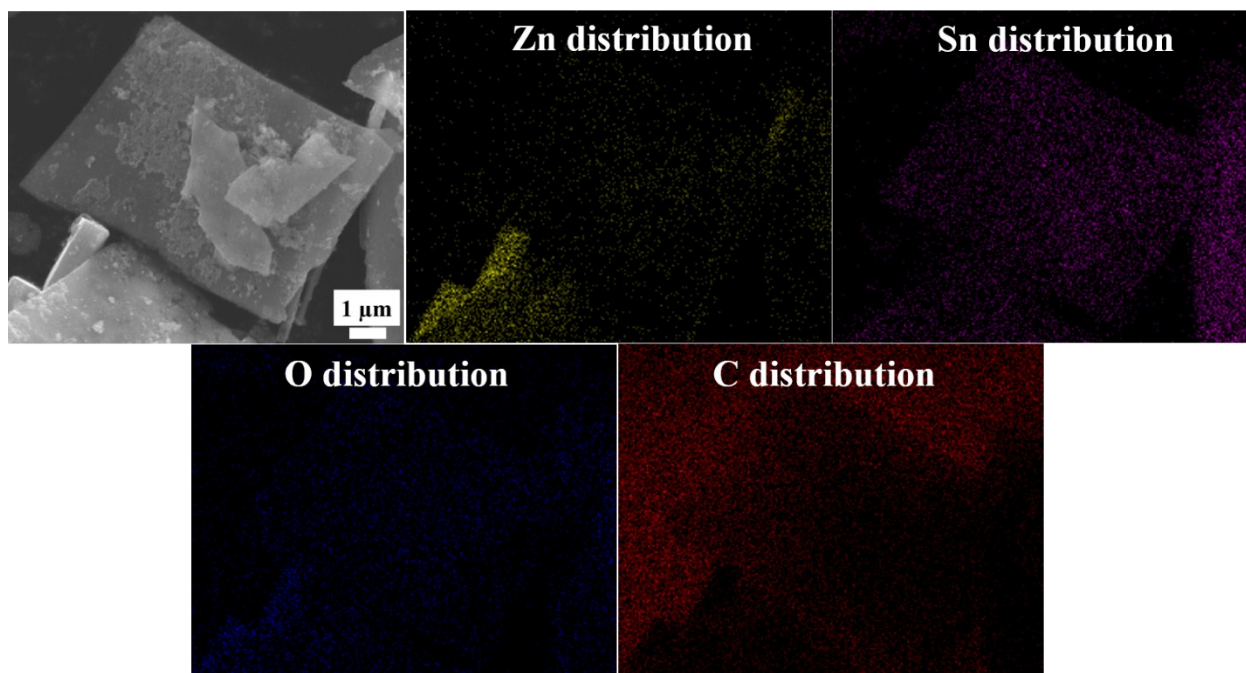

Fig. S2. EDS elemental mapping of the as-synthesized ZSn15 sample.

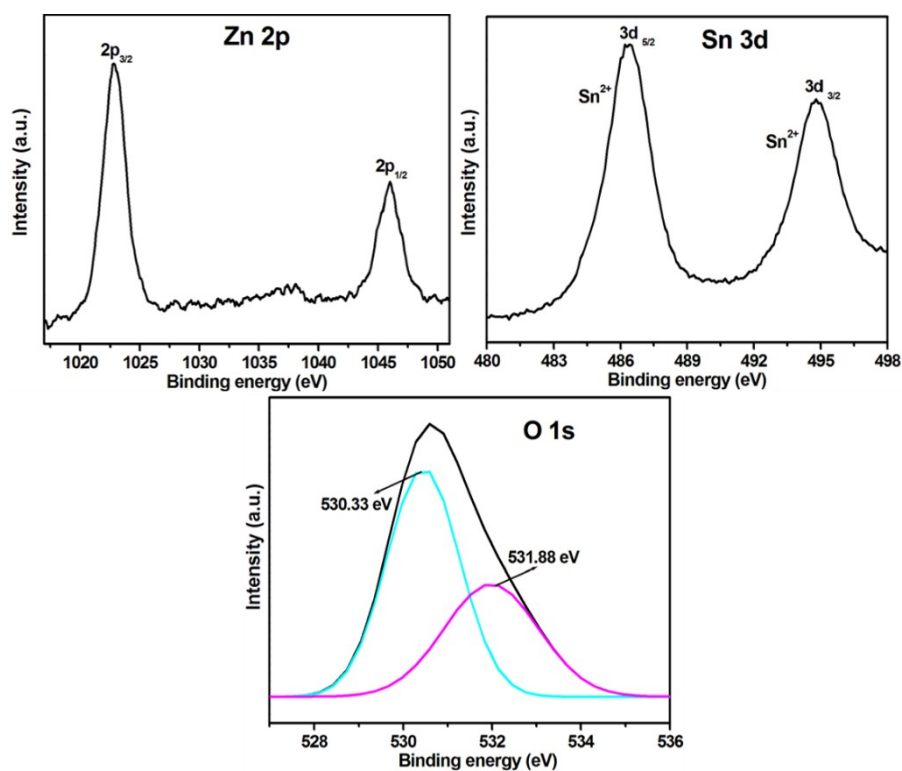

Fig. S3. XPS spectra of (a) Zn 2p state, (b) Sn 3d state and (c) O 1s states of sample ZSn15 after photocatalytic reaction.

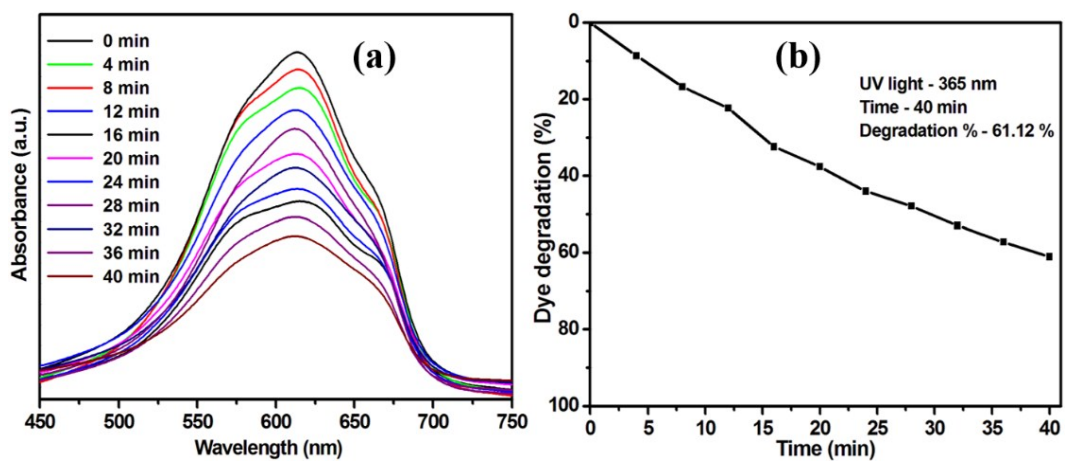

Fig. S4 (a) and (b). Photocatalytic degradation of sample ZSn1 on MB under UV light irradiation.

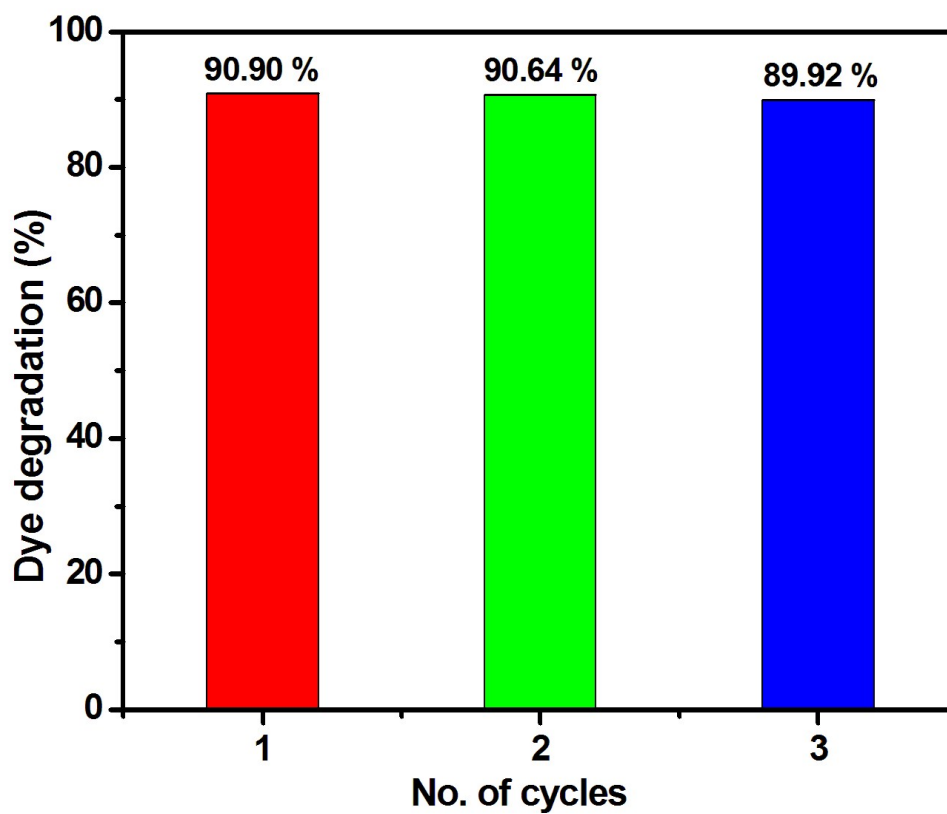

Fig. S5. Reusability of ZnO/SnO photocatalyst

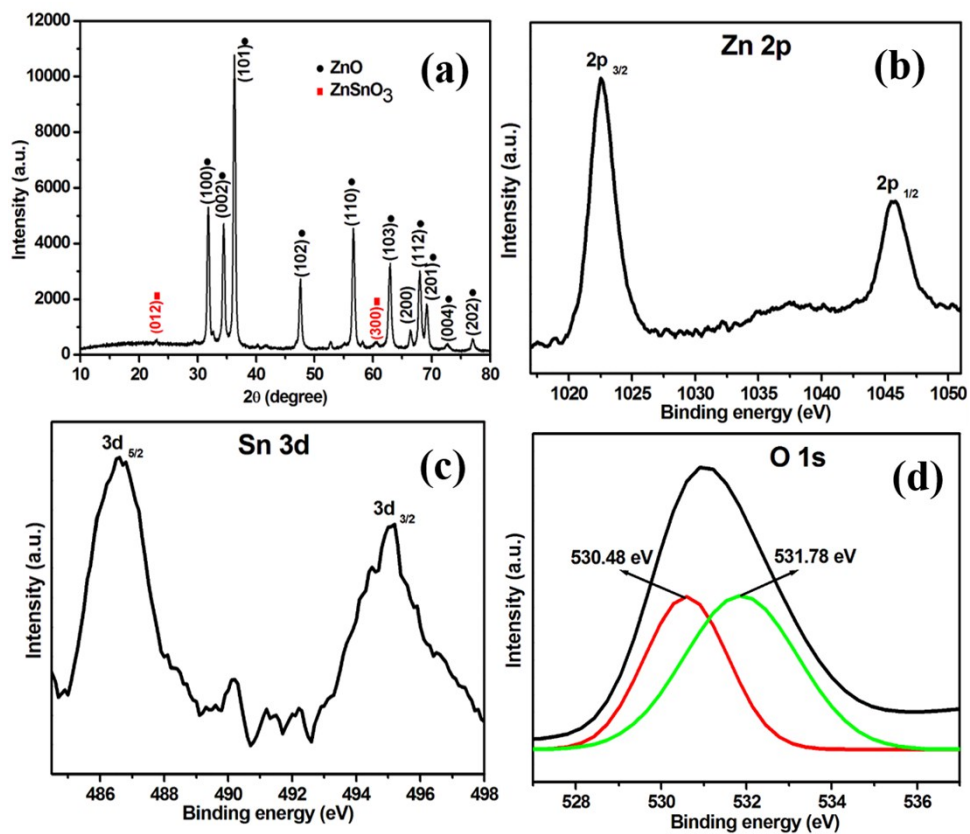

**Fig. S6 (a). XRD and XPS spectra of (b) Zn 2p, (c) Sn 3d and (d) O 1s states of sample ZSn1 after photocatalytic reaction.**
